# Supplementary material for: Type-A response regulators negatively mediate heat stress response by altering redox homeostasis in Arabidopsis
Source: Front Plant Sci. 2022 Sep 23;13:968139. doi: 10.3389/fpls.2022.968139 (PMC9539118; doi:10.3389/fpls.2022.968139)
Supplement: Supplementary file 7 [file Table_1.xlsx]

## Sheet: Supplementary Table S1
Supplementary Table S1: DAPs in arr3,4,5,6,8,9 compared to WT							Gene Ontology Enrichment analysis category Biological Processes
Accession	FC	name	Description				Term	Ontology Source	Term PValue	Term PValue Corrected with Bonferroni step down	Group PValue	Group PValue Corrected with Bonferroni step down	GOLevels	GOGroups	% Associated Genes	Nr. Genes	Associated Genes Found
AT1G31910.1	47.578	PMK	Phosphomevalonate kinase, peroxisomal [Source:UniProtKB/Swiss-Prot;Acc:Q9C6T1]		Significantly higher		response to light intensity	GO_BiologicalProcess-Custom-GOA_21.11.2017_00h00	0.00525734	0.0105147	0.00525734	0.0105147	[5]	Group0	2.46914	4	[ATMIN7, COR15A, Hop3, PKT3]
AT1G67790.1	22.527	SEOC	Protein SIEVE ELEMENT OCCLUSION C [Source:UniProtKB/Swiss-Prot;Acc:Q9FXE2]		Significantly lower		response to cytokinin	GO_BiologicalProcess-Custom-GOA_21.11.2017_00h00	0.00426724	0.017069	0.00426724	0.017069	[4, 5]	Group1	2.02429	5	[AT2G20270, HB2, LHCB4.2, PRXCB, SP1L3]
AT4G33640.1	19.856	AT4G33640	unknown protein; Ha. [Source:TAIR;Acc:AT4G33640]	Threshold FC 1.5			positive regulation of response to stimulus	GO_BiologicalProcess-Custom-GOA_21.11.2017_00h00	0.00865234	0.00865234	0.00865234	0.00865234	[2, 3, 4]	Group2	2.13904	4	[BGLU18, PKT3, PRL1, PRXCB]
AT5G61640.2	10.691	PMSR1	peptidemethionine sulfoxide reductase 1 [Source:TAIR;Acc:AT5G61640]	P value threshold 0.05			alpha-amino acid biosynthetic process	GO_BiologicalProcess-Custom-GOA_21.11.2017_00h00	0.00865234	0.00865234	0.00865234	0.00865234	[5, 6, 7, 8]	Group3	2.13904	4	[AAT, CYSC1, PGDH, TSBtype2]
AT5G44520.2	8.1248	AT5G44520	NagB/RpiA/CoA transferase-like superfamily protein [Source:TAIR;Acc:AT5G44520]				glycosyl compound metabolic process	GO_BiologicalProcess-Custom-GOA_21.11.2017_00h00	0.00434052	0.0130216	0.00434052	0.0130216	[4]	Group4	2.01613	5	[BCAT4, BGLU18, NSP5, TGG2, emb2742]
AT5G55940.1	6.5811	EMB2731	ER membrane protein complex subunit 8/9 homolog [Source:UniProtKB/Swiss-Prot;Acc:Q9FG71]				sulfur compound metabolic process	GO_BiologicalProcess-Custom-GOA_21.11.2017_00h00	6.58983e-06	0.000125207	6.58983e-06	3.9539e-05	[3]	Group5	2.57732	10	[AT1G31910, AT5G63990, BCAT4, CYSC1, FTRA2, GSTT1, MVD1, NFU1, NSP5, TGG2]
AT3G18680.2	6.1954	AT3G18680	Amino acid kinase family protein [Source:UniProtKB/TrEMBL;Acc:A0A1I9LRT3]				response to heat	GO_BiologicalProcess-Custom-GOA_21.11.2017_00h00	0.00200073	0.0160058	0.00200073	0.0100036	[3, 4]	Group6	2.41546	5	[ANNAT4, AT1G59860, COR15A, CRL1, Hop3]
AT1G63610.1	5.7227	AT1G63610	At1g63610 [Source:UniProtKB/TrEMBL;Acc:Q9CAC8]				response to alcohol	GO_BiologicalProcess-Custom-GOA_21.11.2017_00h00	1.35122e-06	2.70244e-05	1.35122e-06	9.45853e-06	[4]	Group7	2.21465	13	[ANNAT4, BGLU18, CIP1, COR15A, CORI3, CRL1, GASA1, LOX1, LTI78, MAP1D, PKT3, RHON1, TGG2]
AT1G08110.4	5.5851	AT1G08110	Lactoylglutathione lyase [Source:UniProtKB/TrEMBL;Acc:B9DH52]				response to abscisic acid	GO_BiologicalProcess-Custom-GOA_21.11.2017_00h00	1.25255e-06	2.63035e-05	1.35122e-06	9.45853e-06	[4, 5]	Group7	2.22985	13	[ANNAT4, BGLU18, CIP1, COR15A, CORI3, CRL1, GASA1, LOX1, LTI78, MAP1D, PKT3, RHON1, TGG2]
AT5G43350.1	5.3103	PHT1-1	Inorganic phosphate transporter 1-1 [Source:UniProtKB/Swiss-Prot;Acc:Q8VYM2]				response to wounding	GO_BiologicalProcess-Custom-GOA_21.11.2017_00h00	0.000464505	0.00603856	2.91554e-08	2.33243e-07	[3]	Group8	2.62009	6	[BCAT4, CORI3, LOX1, LOX2, LTI78, PKT3]
AT1G55020.1	4.2431	LOX1	Linoleate 9S-lipoxygenase 1 [Source:UniProtKB/Swiss-Prot;Acc:Q06327]				organic hydroxy compound metabolic process	GO_BiologicalProcess-Custom-GOA_21.11.2017_00h00	0.000224876	0.00337315	2.91554e-08	2.33243e-07	[3]	Group8	2.46479	7	[AAO2, AT1G31910, ATMIN7, BGLU18, MVD1, PDX1.2, SMT1]
AT1G59860.1	3.7306	HSP17.6A	17.6 kDa class I heat shock protein 1 [Source:UniProtKB/Swiss-Prot;Acc:Q9XIE3]				steroid metabolic process	GO_BiologicalProcess-Custom-GOA_21.11.2017_00h00	0.00129994	0.0129994	2.91554e-08	2.33243e-07	[4]	Group8	3.63636	4	[AT1G31910, ATMIN7, MVD1, SMT1]
AT1G65020.1	3.3639	AT1G65020	At1g65020 [Source:UniProtKB/TrEMBL;Acc:Q5XF12]				lipid biosynthetic process	GO_BiologicalProcess-Custom-GOA_21.11.2017_00h00	5.66066e-07	1.24535e-05	2.91554e-08	2.33243e-07	[4]	Group8	2.39411	13	[AAO2, AT1G31910, ATMIN7, DXR, FTRA2, HB2, LOX1, LOX2, LUT1, MVD1, PKT3, SMT1, ZDS]
AT5G08410.2	2.8846	FTRA2	ferredoxin/thioredoxin reductase subunit A (variable subunit) 2 [Source:TAIR;Acc:AT5G08410]				organic hydroxy compound biosynthetic process	GO_BiologicalProcess-Custom-GOA_21.11.2017_00h00	0.000147789	0.00236462	2.91554e-08	2.33243e-07	[4]	Group8	3.24324	6	[AAO2, AT1G31910, ATMIN7, MVD1, PDX1.2, SMT1]
AT3G29250.1	2.6642	SDR4	Short-chain dehydrogenase reductase 4 [Source:UniProtKB/Swiss-Prot;Acc:F4J2Z7]				isoprenoid metabolic process	GO_BiologicalProcess-Custom-GOA_21.11.2017_00h00	1.80115e-05	0.000324206	2.91554e-08	2.33243e-07	[4, 5]	Group8	3.68421	7	[AAO2, AT1G31910, BGLU18, DXR, LUT1, MVD1, ZDS]
AT5G14220.1	2.5861	HEMG2	Flavin containing amine oxidoreductase family [Source:TAIR;Acc:AT5G14220]				lipid modification	GO_BiologicalProcess-Custom-GOA_21.11.2017_00h00	0.000723451	0.00795796	2.91554e-08	2.33243e-07	[4, 5]	Group8	4.25532	4	[AT5G63990, LOX1, LOX2, PKT3]
AT5G26260.1	2.5082	AT5G26260	F9D12.8 protein [Source:UniProtKB/TrEMBL;Acc:O81493]				organophosphate biosynthetic process	GO_BiologicalProcess-Custom-GOA_21.11.2017_00h00	0.00174885	0.0157396	2.91554e-08	2.33243e-07	[4, 5]	Group8	2.02703	6	[AT1G31910, AT3G18680, DXR, MVD1, PDX1.2, emb2742]
AT2G27600.1	2.486	SKD1	Protein SUPPRESSOR OF K(+) TRANSPORT GROWTH DEFECT 1 [Source:UniProtKB/Swiss-Prot;Acc:Q9ZNT0]				steroid biosynthetic process	GO_BiologicalProcess-Custom-GOA_21.11.2017_00h00	0.000411828	0.0057656	2.91554e-08	2.33243e-07	[5]	Group8	4.93827	4	[AT1G31910, ATMIN7, MVD1, SMT1]
AT2G26230.1	2.4044	AT2G26230	Uricase [Source:UniProtKB/Swiss-Prot;Acc:O04420]				isoprenoid biosynthetic process	GO_BiologicalProcess-Custom-GOA_21.11.2017_00h00	7.62759e-05	0.00129669	2.91554e-08	2.33243e-07	[4, 5, 6]	Group8	3.65854	6	[AAO2, AT1G31910, DXR, LUT1, MVD1, ZDS]
AT5G64050.1	2.3248	OVA3	Glutamate--tRNA ligase, chloroplastic/mitochondrial [Source:UniProtKB/Swiss-Prot;Acc:Q9FEA2]				fatty acid metabolic process	GO_BiologicalProcess-Custom-GOA_21.11.2017_00h00	0.00419485	0.0209742	2.91554e-08	2.33243e-07	[4, 5, 7]	Group8	2.03252	5	[FTRA2, HB2, LOX1, LOX2, PKT3]
AT4G12400.2	2.283	HOP3	Hsp70-Hsp90 organizing protein 3 [Source:UniProtKB/Swiss-Prot;Acc:Q9STH1]				terpenoid metabolic process	GO_BiologicalProcess-Custom-GOA_21.11.2017_00h00	0.000673884	0.00808661	2.91554e-08	2.33243e-07	[5, 6]	Group8	3.08642	5	[AAO2, BGLU18, DXR, LUT1, ZDS]
AT5G18110.1	2.256	NCBP	Eukaryotic translation initiation factor NCBP [Source:UniProtKB/Swiss-Prot;Acc:Q9FK59]				terpenoid biosynthetic process	GO_BiologicalProcess-Custom-GOA_21.11.2017_00h00	0.00289623	0.0202736	2.91554e-08	2.33243e-07	[5, 6, 7]	Group8	2.91971	4	[AAO2, DXR, LUT1, ZDS]
AT1G66070.1	2.2456	AT1G66070	Eukaryotic translation initiation factor 3 subunit J [Source:UniProtKB/TrEMBL;Acc:A0A178WCY1]				fatty acid biosynthetic process	GO_BiologicalProcess-Custom-GOA_21.11.2017_00h00	0.00525734	0.0105147	2.91554e-08	2.33243e-07	[5, 6, 7, 8]	Group8	2.46914	4	[FTRA2, LOX1, LOX2, PKT3]
AT3G43300.1	2.237	ATMIN7	HOPM interactor 7 [Source:TAIR;Acc:AT3G43300]				monocarboxylic acid biosynthetic process	GO_BiologicalProcess-Custom-GOA_21.11.2017_00h00	0.00412334	0.02474	2.91554e-08	2.33243e-07	[6, 7]	Group8	2.04082	5	[AAO2, FTRA2, LOX1, LOX2, PKT3]
AT5G49360.1	2.2111	BXL1	Beta-D-xylosidase 1 [Source:UniProtKB/Swiss-Prot;Acc:Q9FGY1]
AT4G31790.1	2.1541	AT4G31790	Probable diphthine methyl ester synthase [Source:UniProtKB/Swiss-Prot;Acc:O81769]
AT4G10840.1	2.1225	KLCR1	Protein KINESIN LIGHT CHAIN-RELATED 1 [Source:UniProtKB/Swiss-Prot;Acc:O81629]
AT4G24800.3	2.0953	AT4G24800	ECIP1 [Source:UniProtKB/TrEMBL;Acc:A0A384KU64]
AT4G33400.1	2.0681	AT4G33400	Dem-like protein [Source:UniProtKB/TrEMBL;Acc:Q9SZB7]
AT4G20960.1	2.0545	PYRD	Riboflavin biosynthesis protein PYRD, chloroplastic [Source:UniProtKB/Swiss-Prot;Acc:Q8GWP5]
AT3G15260.1	2.051	AT3G15260	Probable protein phosphatase 2C 39 [Source:UniProtKB/Swiss-Prot;Acc:Q9LDA7]
AT3G49120.1	2.0308	PER34	Peroxidase 34 [Source:UniProtKB/Swiss-Prot;Acc:Q9SMU8]
AT5G63990.1	1.9751	SAL3	Probable SAL3 phosphatase [Source:UniProtKB/Swiss-Prot;Acc:Q8GY63]
AT5G66420.2	1.964	AT5G66420	AT5G66420 protein [Source:UniProtKB/TrEMBL;Acc:Q9FJZ7]
AT5G41210.1	1.9137	GSTT1	Glutathione S-transferase T1 [Source:UniProtKB/Swiss-Prot;Acc:Q9ZRT5]
AT3G43600.1	1.9103	AAO2	Indole-3-acetaldehyde oxidase [Source:UniProtKB/Swiss-Prot;Acc:Q7G192]
AT1G51100.1	1.9016	AT1G51100	CRR41 [Source:UniProtKB/TrEMBL;Acc:A0A178W725]
AT2G31570.1	1.8916	GPX2	Probable glutathione peroxidase 2 [Source:UniProtKB/Swiss-Prot;Acc:O04922]
AT1G29310.1	1.8693	AT1G29310	SecY protein transport family protein [Source:UniProtKB/TrEMBL;Acc:Q8RWJ5]
AT5G48180.1	1.8509	NSP5	Nitrile-specifier protein 5 [Source:UniProtKB/Swiss-Prot;Acc:Q93XW5]
AT4G26010.2	1.8122	AT4G26010	Peroxidase superfamily protein [Source:TAIR;Acc:AT4G26010]
AT2G43970.1	1.8111	LARP6B	La-related protein 6B [Source:UniProtKB/Swiss-Prot;Acc:O80567]
AT5G66470.2	1.7881	AT5G66470	GTPase ERA-like, chloroplastic [Source:UniProtKB/Swiss-Prot;Acc:Q8VZ74]
AT3G59020.2	1.7793	AT3G59020	Importin beta-like SAD2 homolog [Source:UniProtKB/Swiss-Prot;Acc:F4J738]
AT5G22620.5	1.7558	AT5G22620	Probable 2-carboxy-D-arabinitol-1-phosphatase [Source:UniProtKB/Swiss-Prot;Acc:Q9FNJ9]
AT5G12110.1	1.7287	AT5G12110	At5g12110 [Source:UniProtKB/TrEMBL;Acc:Q29PY2]
AT4G02570.4	1.714	CUL1	AT4G02570 protein [Source:UniProtKB/TrEMBL;Acc:B9DGE3]
AT5G54940.3	1.7013	AT5G54940	AT5g54940/MBG8_21 [Source:UniProtKB/TrEMBL;Acc:Q9FFT6]
AT4G15900.1	1.6952	PRL1	Protein pleiotropic regulatory locus 1 [Source:UniProtKB/Swiss-Prot;Acc:Q42384]
AT3G16050.1	1.6703	PDX12	Pyridoxal 5'-phosphate synthase-like subunit PDX1.2 [Source:UniProtKB/Swiss-Prot;Acc:Q9ZNR6]
AT2G47650.1	1.6559	UXS4	AT2G47650 protein [Source:UniProtKB/TrEMBL;Acc:C0Z2I3]
AT1G70850.1	1.6521	MLP34	MLP34 [Source:UniProtKB/TrEMBL;Acc:A0A384KEJ8]
AT3G57290.1	1.6431	TIF3E1	Eukaryotic translation initiation factor 3 subunit E [Source:UniProtKB/TrEMBL;Acc:A0A178VL03]
AT2G38750.1	1.592	ANN4	Annexin D4 [Source:UniProtKB/Swiss-Prot;Acc:Q9ZVJ6]
ATCG00330.1	1.5761	RPS14	30S ribosomal protein S14, chloroplastic [Source:UniProtKB/TrEMBL;Acc:A0A1B1W4T5]
AT2G33150.1	1.5685	PED1	PKT3 [Source:UniProtKB/TrEMBL;Acc:A0A178VRP9]
AT2G20270.1	1.5612	AT2G20270	Thioredoxin superfamily protein [Source:UniProtKB/TrEMBL;Acc:F4IUG7]
AT2G34640.1	1.5545	PTAC12	Protein PLASTID TRANSCRIPTIONALLY ACTIVE 12, chloroplastic [Source:UniProtKB/Swiss-Prot;Acc:F4IHY7]
AT5G41790.1	1.5545	CIP1	COP1-interactive protein 1 [Source:UniProtKB/Swiss-Prot;Acc:F4JZY1]
AT3G10520.1	1.5531	AHB2	Non-symbiotic hemoglobin 2 [Source:UniProtKB/Swiss-Prot;Acc:O24521]
AT3G18035.1	1.5508	HON4	At3g18035 [Source:UniProtKB/TrEMBL;Acc:Q9LSK7]
AT5G14260.1	1.5441	AT5G14260	Rubisco methyltransferase family protein [Source:UniProtKB/TrEMBL;Acc:Q8VZB5]
AT3G02540.1	1.515	RAD23C	Ubiquitin receptor RAD23c [Source:UniProtKB/Swiss-Prot;Acc:Q84L31]
AT3G04870.4	1.506	ZDS1	Zeta-carotene desaturase, chloroplastic/chromoplastic [Source:UniProtKB/Swiss-Prot;Acc:Q38893]
AT4G13200.1	0.65666	AT4G13200	Uncharacterized protein At4g13200, chloroplastic [Source:UniProtKB/Swiss-Prot;Acc:Q8LDV3]
AT5G40370.1	0.6563	AT5G40370	Glutaredoxin family protein [Source:UniProtKB/TrEMBL;Acc:B3H604]
AT3G23450.4	0.6558	AT3G23450	Transmembrane protein [Source:UniProtKB/TrEMBL;Acc:Q9LW52]
AT3G61440.1	0.64372	CYSC1	Bifunctional L-3-cyanoalanine synthase/cysteine synthase C1, mitochondrial [Source:UniProtKB/Swiss-Prot;Acc:Q9S757]
AT5G22650.1	0.63536	HDT2	Histone deacetylase HDT2 [Source:UniProtKB/Swiss-Prot;Acc:Q56WH4]
AT1G61570.1	0.62479	TIM13	Mitochondrial import inner membrane translocase subunit TIM13 [Source:UniProtKB/Swiss-Prot;Acc:Q9XH48]
AT2G33590.1	0.60252	AT2G33590	CRL1 [Source:UniProtKB/TrEMBL;Acc:A0A178VRE7]
AT3G45140.1	0.60241	LOX2	Lipoxygenase 2, chloroplastic [Source:UniProtKB/Swiss-Prot;Acc:P38418]
AT2G28470.3	0.59486	BGAL8	Beta-galactosidase 8 [Source:UniProtKB/Swiss-Prot;Acc:Q9SCV4]
AT5G26860.1	0.58934	LON_ARA_ARA	lon protease 1 [Source:TAIR;Acc:AT5G26860]
AT3G11930.3	0.58891	AT3G11930	AT3G11930 protein [Source:UniProtKB/TrEMBL;Acc:B9DG73]
AT3G53130.1	0.5872	CYP97C1	Carotene epsilon-monooxygenase, chloroplastic [Source:UniProtKB/Swiss-Prot;Acc:Q6TBX7]
AT4G37040.1	0.56361	MAP1D	Methionine aminopeptidase [Source:UniProtKB/TrEMBL;Acc:A0A178UWL4]
AT4G02580.1	0.56213	AT4G02580	NADH dehydrogenase [ubiquinone] flavoprotein 2, mitochondrial [Source:UniProtKB/Swiss-Prot;Acc:O22769]
AT5G25980.2	0.54588	TGG2	Myrosinase 2 [Source:UniProtKB/Swiss-Prot;Acc:Q9C5C2]
AT5G38530.1	0.54047	TSBtype2	Tryptophan synthase beta chain [Source:UniProtKB/TrEMBL;Acc:Q9FFW8]
AT3G02180.1	0.53354	SP1L3	Protein SPIRAL1-like 3 [Source:UniProtKB/Swiss-Prot;Acc:Q9S7P8]
AT5G05960.1	0.52944	AT5G05960	At5g05960 [Source:UniProtKB/TrEMBL;Acc:Q8LBY9]
AT2G22250.3	0.52388	PAT	Bifunctional aspartate aminotransferase and glutamate/aspartate-prephenate aminotransferase [Source:UniProtKB/Swiss-Prot;Acc:Q9SIE1]
AT3G47833.1	0.50296	SDH7A	Succinate dehydrogenase subunit 7A, mitochondrial [Source:UniProtKB/Swiss-Prot;Acc:Q9C5E8]
AT4G23600.1	0.48029	CORI3	Cystine lyase CORI3 [Source:UniProtKB/Swiss-Prot;Acc:Q9SUR6]
AT2G38700.1	0.45464	MVD1	Diphosphomevalonate decarboxylase [Source:UniProtKB/TrEMBL;Acc:A0A178VRG6]
AT2G43810.1	0.44709	LSM6B	Sm-like protein LSM36B [Source:UniProtKB/Swiss-Prot;Acc:O22823]
AT3G19710.1	0.44441	BCAT4	Methionine aminotransferase BCAT4 [Source:UniProtKB/Swiss-Prot;Acc:Q9LE06]
AT3G08940.2	0.44028	LHCB4.2	Chlorophyll a-b binding protein CP29.2, chloroplastic [Source:UniProtKB/Swiss-Prot;Acc:Q9XF88]
AT5G13710.1	0.41783	SMT1	Cycloartenol-C-24-methyltransferase [Source:UniProtKB/Swiss-Prot;Acc:Q9LM02]
AT4G01940.1	0.4161	NIFU1	NifU-like protein 1, chloroplastic [Source:UniProtKB/Swiss-Prot;Acc:Q93W77]
AT1G75750.1	0.40765	GASA1	GASA1 [Source:UniProtKB/TrEMBL;Acc:A0A178W4S5]
AT5G01750.2	0.39909	AT5G01750	Protein LURP-one-related 15 [Source:UniProtKB/Swiss-Prot;Acc:Q9LZX1]
AT5G52310.1	0.39653	RD29A	Low-temperature-induced 78 kDa protein [Source:UniProtKB/Swiss-Prot;Acc:Q06738]
AT1G06190.5	0.39317	AT1G06190	Rho termination factor [Source:TAIR;Acc:AT1G06190]
AT5G19180.1	0.36221	ECR1	NEDD8-activating enzyme E1 catalytic subunit [Source:UniProtKB/Swiss-Prot;Acc:O65041]
AT1G52400.1	0.36212	BGLU18	Beta-D-glucopyranosyl abscisate beta-glucosidase [Source:UniProtKB/Swiss-Prot;Acc:Q9SE50]
AT1G04680.1	0.35538	AT1G04680	Pectate lyase [Source:UniProtKB/TrEMBL;Acc:A0A178W464]
AT2G42540.2	0.34862	COR15A	Protein COLD-REGULATED 15A, chloroplastic [Source:UniProtKB/Swiss-Prot;Acc:Q42512]
ATCG00350.1	0.34173	PSAA	Photosystem I P700 chlorophyll a apoprotein A1 [Source:UniProtKB/Swiss-Prot;Acc:P56766]
AT1G59990.1	0.33678	RH22	DEAD-box ATP-dependent RNA helicase 22 [Source:UniProtKB/Swiss-Prot;Acc:Q944S1]
AT1G14710.1	0.32865	AT1G14710	Hydroxyproline-rich glycoprotein family protein [Source:UniProtKB/TrEMBL;Acc:F4HWB0]
AT2G22125.1	0.31223	CSI1	Protein CELLULOSE SYNTHASE INTERACTIVE 1 [Source:UniProtKB/Swiss-Prot;Acc:F4IIM1]
AT5G62790.2	0.30695	DXR	1-deoxy-D-xylulose 5-phosphate reductoisomerase [Source:UniProtKB/TrEMBL;Acc:F4K7T6]
AT3G12670.1	0.28286	emb2742	Emb2742 [Source:UniProtKB/TrEMBL;Acc:A0A384K8P2]
AT5G22510.2	0.26401	INVE	Alkaline/neutral invertase E, chloroplastic [Source:UniProtKB/Swiss-Prot;Acc:Q9FK88]
AT4G34120.1	0.23943	CBSX2	CBS domain-containing protein CBSX2, chloroplastic [Source:UniProtKB/Swiss-Prot;Acc:Q9C5D0]
AT5G27560.3	0.23604	AT5G27560	DUF1995 domain protein, putative (DUF1995) [Source:UniProtKB/TrEMBL;Acc:Q94K68]
AT1G17745.2	0.14424	PGDH	D-3-phosphoglycerate dehydrogenase [Source:TAIR;Acc:AT1G17745]
AT5G06110.1	0.11466	AT5G06110	Cell division related protein-like [Source:UniProtKB/TrEMBL;Acc:Q9LHS5]
AT3G17410.2	0.11367	AT3G17410	Protein kinase superfamily protein [Source:UniProtKB/TrEMBL;Acc:Q9LUT0]
AT3G27280.1	0.094029	PHB4	Prohibitin-4, mitochondrial [Source:UniProtKB/Swiss-Prot;Acc:Q9LK25]
AT2G07360.2	0.084155	AT2G07360	SH3 domain-containing protein [Source:UniProtKB/TrEMBL;Acc:F4IL68]
AT2G03820.1	0.05955	AT2G03820	60S ribosomal export protein NMD3 [Source:UniProtKB/TrEMBL;Acc:Q9SI58]

## Sheet: Supplementary Table S2
Supplementary Table S2: DAPs in arr5,6,8,9 compared to WT
Accession	FC	name	Description				ID	Term	Ontology Source	Term PValue	Term PValue Corrected with Bonferroni step down	Group PValue	Group PValue Corrected with Bonferroni step down	GOLevels	GOGroups	% Associated Genes	Nr. Genes	Associated Genes Found
AT1G31910.1	45.125	PMK	Phosphomevalonate kinase, peroxisomal [Source:UniProtKB/Swiss-Prot;Acc:Q9C6T1]		Significantly higher		GO:0009636	response to toxic substance	GO_BiologicalProcess-Custom-GOA_21.11.2017_00h00	9.12335e-05	9.12335e-05	9.12335e-05	9.12335e-05	[3]	Group0	3.63636	4	[AT3G56350, CORI3, GSTT1, GSTU1]
AT4G33640.1	9.7541	AT4G33640	unknown protein; Ha. [Source:TAIR;Acc:AT4G33640]		Significantly lower
AT1G63610.1	7.7831	AT1G63610	At1g63610 [Source:UniProtKB/TrEMBL;Acc:Q9CAC8]	Threshold FC 1.5
AT5G55940.1	6.7045	EMB2731	ER membrane protein complex subunit 8/9 homolog [Source:UniProtKB/Swiss-Prot;Acc:Q9FG71]	P value threshold 0.05
AT5G43350.1	6.4458	PHT1-1	Inorganic phosphate transporter 1-1 [Source:UniProtKB/Swiss-Prot;Acc:Q8VYM2]
AT1G54050.1	4.9793	HSP17.4B	17.4 kDa class III heat shock protein [Source:UniProtKB/Swiss-Prot;Acc:Q9SYG1]
AT1G05350.1	4.5659	AT1G05350	Ubiquitin-like modifier-activating enzyme 5 [Source:UniProtKB/Swiss-Prot;Acc:O23034]
AT1G65020.1	3.3266	AT1G65020	At1g65020 [Source:UniProtKB/TrEMBL;Acc:Q5XF12]
AT5G08410.2	3.2778	FTRA2	ferredoxin/thioredoxin reductase subunit A (variable subunit) 2 [Source:TAIR;Acc:AT5G08410]
AT1G64740.1	3.1076	TUBA1	Tubulin alpha-1 chain [Source:UniProtKB/Swiss-Prot;Acc:P11139]
AT3G05625.1	3.0969	AT3G05625	At3g05625 [Source:UniProtKB/TrEMBL;Acc:Q8GUK5]
AT1G59860.1	2.9188	HSP17.6A	17.6 kDa class I heat shock protein 1 [Source:UniProtKB/Swiss-Prot;Acc:Q9XIE3]
AT3G59020.2	2.4025	AT3G59020	Importin beta-like SAD2 homolog [Source:UniProtKB/Swiss-Prot;Acc:F4J738]
AT2G27600.1	2.4025	SKD1	Protein SUPPRESSOR OF K(+) TRANSPORT GROWTH DEFECT 1 [Source:UniProtKB/Swiss-Prot;Acc:Q9ZNT0]
AT3G44620.2	2.3871	AT3G44620	Protein-tyrosine phosphatase [Source:UniProtKB/TrEMBL;Acc:F4J355]
AT5G61970.1	2.2176	AT5G61970	Signal recognition particle subunit SRP68 [Source:UniProtKB/TrEMBL;Acc:Q9FH46]
AT4G20960.1	2.1866	PYRD	Riboflavin biosynthesis protein PYRD, chloroplastic [Source:UniProtKB/Swiss-Prot;Acc:Q8GWP5]
AT5G64050.1	2.1587	OVA3	Glutamate--tRNA ligase, chloroplastic/mitochondrial [Source:UniProtKB/Swiss-Prot;Acc:Q9FEA2]
AT2G31570.1	2.1145	GPX2	Probable glutathione peroxidase 2 [Source:UniProtKB/Swiss-Prot;Acc:O04922]
AT2G29490.1	2.0456	GSTU1	Glutathione S-transferase U1 [Source:UniProtKB/Swiss-Prot;Acc:Q9ZW30]
AT1G51100.1	1.9826	AT1G51100	CRR41 [Source:UniProtKB/TrEMBL;Acc:A0A178W725]
AT3G15260.1	1.9718	AT3G15260	Probable protein phosphatase 2C 39 [Source:UniProtKB/Swiss-Prot;Acc:Q9LDA7]
AT5G41210.1	1.9667	GSTT1	Glutathione S-transferase T1 [Source:UniProtKB/Swiss-Prot;Acc:Q9ZRT5]
AT4G02570.4	1.908	CUL1	AT4G02570 protein [Source:UniProtKB/TrEMBL;Acc:B9DGE3]
AT4G26010.2	1.898	AT4G26010	Peroxidase superfamily protein [Source:TAIR;Acc:AT4G26010]
AT4G39210.1	1.8419	APL3	Glucose-1-phosphate adenylyltransferase [Source:UniProtKB/TrEMBL;Acc:A0A178US50]
AT5G56500.2	1.8396	CPN60B3	Chaperonin 60 subunit beta 3, chloroplastic [Source:UniProtKB/Swiss-Prot;Acc:C0Z361]
AT5G12110.1	1.8251	AT5G12110	At5g12110 [Source:UniProtKB/TrEMBL;Acc:Q29PY2]
AT3G15356.1	1.8101	LEC	Lectin-like protein LEC [Source:UniProtKB/Swiss-Prot;Acc:Q9LJR2]
AT5G26260.1	1.708	AT5G26260	F9D12.8 protein [Source:UniProtKB/TrEMBL;Acc:O81493]
ATCG00330.1	1.6836	RPS14	30S ribosomal protein S14, chloroplastic [Source:UniProtKB/TrEMBL;Acc:A0A1B1W4T5]
AT3G56350.1	1.6734	MSD2	Superoxide dismutase [Source:UniProtKB/TrEMBL;Acc:A0A178VDJ0]
AT5G66470.2	1.587	AT5G66470	GTPase ERA-like, chloroplastic [Source:UniProtKB/Swiss-Prot;Acc:Q8VZ74]
AT3G47590.1	1.5654	AT3G47590	Alpha/beta-Hydrolases superfamily protein [Source:UniProtKB/TrEMBL;Acc:Q9SN79]
AT3G16000.1	1.5576	MFP1	MAR-binding filament-like protein 1 [Source:UniProtKB/Swiss-Prot;Acc:Q9LW85]
AT2G32520.1	1.5456	AT2G32520	alpha/beta-Hydrolases superfamily protein [Source:TAIR;Acc:AT2G32520]
AT3G54090.1	1.5128	FLN1	Fructokinase-like 1, chloroplastic [Source:UniProtKB/Swiss-Prot;Acc:Q9M394]
AT4G33400.1	1.5105	AT4G33400	Dem-like protein [Source:UniProtKB/TrEMBL;Acc:Q9SZB7]
AT5G27640.2	0.63796	TIF3B1	Eukaryotic translation initiation factor 3 subunit B [Source:UniProtKB/TrEMBL;Acc:F4K4D5]
AT4G12830.1	0.63356	AT4G12830	AT4g12830/T20K18_180 [Source:UniProtKB/TrEMBL;Acc:Q93ZN4]
AT2G33590.1	0.5966	AT2G33590	CRL1 [Source:UniProtKB/TrEMBL;Acc:A0A178VRE7]
AT3G47833.1	0.58688	SDH7A	Succinate dehydrogenase subunit 7A, mitochondrial [Source:UniProtKB/Swiss-Prot;Acc:Q9C5E8]
AT4G23600.1	0.56037	CORI3	Cystine lyase CORI3 [Source:UniProtKB/Swiss-Prot;Acc:Q9SUR6]
AT2G01470.1	0.51546	STL2P	SEC12-like protein 2 [Source:UniProtKB/Swiss-Prot;Acc:Q39221]
AT3G04550.1	0.50629	RAF1.2	Rubisco accumulation factor 1.2, chloroplastic [Source:UniProtKB/Swiss-Prot;Acc:Q9SR19]
AT2G38700.1	0.50351	MVD1	Diphosphomevalonate decarboxylase [Source:UniProtKB/TrEMBL;Acc:A0A178VRG6]
AT3G04880.1	0.49296	DRT102	DNA damage-repair/toleration protein DRT102 [Source:UniProtKB/Swiss-Prot;Acc:Q05212]
AT4G14040.1	0.48403	SBP2	Selenium-binding protein 2 [Source:UniProtKB/Swiss-Prot;Acc:Q93WN0]
ATCG00350.1	0.4797	PSAA	Photosystem I P700 chlorophyll a apoprotein A1 [Source:UniProtKB/Swiss-Prot;Acc:P56766]
AT4G01940.1	0.4705	NIFU1	NifU-like protein 1, chloroplastic [Source:UniProtKB/Swiss-Prot;Acc:Q93W77]
AT5G22510.2	0.45601	INVE	Alkaline/neutral invertase E, chloroplastic [Source:UniProtKB/Swiss-Prot;Acc:Q9FK88]
AT2G42540.2	0.40771	COR15A	Protein COLD-REGULATED 15A, chloroplastic [Source:UniProtKB/Swiss-Prot;Acc:Q42512]
AT1G59990.1	0.32091	RH22	DEAD-box ATP-dependent RNA helicase 22 [Source:UniProtKB/Swiss-Prot;Acc:Q944S1]
AT5G59420.1	0.32017	ORP3C	Oxysterol-binding protein-related protein 3C [Source:UniProtKB/Swiss-Prot;Acc:Q93Y40]
AT5G62790.2	0.26786	DXR	1-deoxy-D-xylulose 5-phosphate reductoisomerase [Source:UniProtKB/TrEMBL;Acc:F4K7T6]
AT5G27560.3	0.26277	AT5G27560	DUF1995 domain protein, putative (DUF1995) [Source:UniProtKB/TrEMBL;Acc:Q94K68]
AT3G17410.2	0.24365	AT3G17410	Protein kinase superfamily protein [Source:UniProtKB/TrEMBL;Acc:Q9LUT0]
AT1G14710.1	0.22203	AT1G14710	Hydroxyproline-rich glycoprotein family protein [Source:UniProtKB/TrEMBL;Acc:F4HWB0]
AT1G55150.2	0.058833	AT1G55150	DEA(D/H)-box RNA helicase family protein [Source:TAIR;Acc:AT1G55150]
AT2G03820.1	0.046306	AT2G03820	60S ribosomal export protein NMD3 [Source:UniProtKB/TrEMBL;Acc:Q9SI58]
AT5G06110.1	0.042467	AT5G06110	Cell division related protein-like [Source:UniProtKB/TrEMBL;Acc:Q9LHS5]

## Sheet: Supplementay Table S3
Supplementary Table S3: DAPs in WT after heat-acclimatization											Gene Ontology Enrichment analysis category Biological Processes
Accession	FC	Converted alias	Description								ID	Term	Ontology Source	Term PValue	Term PValue Corrected with Bonferroni step down	Group PValue	Group PValue Corrected with Bonferroni step down	GOLevels	GOGroups	% Associated Genes	Nr. Genes	Associated Genes Found
AT1G54050	50.994	HSP17.4B	17.4 kDa class III heat shock protein [Source:UniProtKB/Swiss-Prot;Acc:Q9SYG1]						Significantly higher		GO:0010286	heat acclimation	GO_BiologicalProcess-Custom-GOA_21.11.2017_00h00	1.46525e-07	7.17974e-06	1.46525e-07	7.32627e-07	[4, 5]	Group0	12.766	6	[AT5G48570, BOB1, HSA32, HSP18.2, Hop3, ROF1]
AT1G31910	43.733	PMK	Phosphomevalonate kinase, peroxisomal [Source:UniProtKB/Swiss-Prot;Acc:Q9C6T1]						Significantly lower		GO:0090407	organophosphate biosynthetic process	GO_BiologicalProcess-Custom-GOA_21.11.2017_00h00	0.000859044	0.0352208	0.000859044	0.000859044	[4, 5]	Group1	2.36486	7	[AT1G31910, AT3G18680, ATP3, DXR, MVD1, PDX1.2, emb2742]
AT1G67790	39.859	SEOC	Protein SIEVE ELEMENT OCCLUSION C [Source:UniProtKB/Swiss-Prot;Acc:Q9FXE2]					Threshold FC 1.5			GO:0006082	organic acid metabolic process	GO_BiologicalProcess-Custom-GOA_21.11.2017_00h00	0.000179996	0.0084598	0.000179996	0.000359991	[3]	Group2	1.44014	16	[5-FCL, AT1G63610, AT1G63660, AT2G17630, AT2G24580, AT2G26230, CAC3, DXR, ERS, FTRA2, GLDH, LOX1, MTK, NSP5, SOT16, TSBtype2]
AT1G53540	39.82	HSP17.6C	17.6 kDa class I heat shock protein 3 [Source:UniProtKB/Swiss-Prot;Acc:P13853]					P value threshold 0.05			GO:0043436	oxoacid metabolic process	GO_BiologicalProcess-Custom-GOA_21.11.2017_00h00	0.00055166	0.0237214	0.000179996	0.000359991	[4]	Group2	1.35501	15	[5-FCL, AT1G63610, AT1G63660, AT2G17630, AT2G24580, CAC3, DXR, ERS, FTRA2, GLDH, LOX1, MTK, NSP5, SOT16, TSBtype2]
AT5G51440	26.6	HSP23.5	23.5 kDa heat shock protein, mitochondrial [Source:UniProtKB/Swiss-Prot;Acc:Q9FGM9]								GO:0006790	sulfur compound metabolic process	GO_BiologicalProcess-Custom-GOA_21.11.2017_00h00	0.000180984	0.00832528	4.96132e-05	0.00014884	[3]	Group3	2.31959	9	[AT1G31910, AT5G63990, CAC3, FTRA2, GSTT1, MTK, MVD1, NSP5, SOT16]
AT4G33640	15.363	AT4G33640	unknown protein; Ha. [Source:TAIR;Acc:AT4G33640]								GO:0006732	coenzyme metabolic process	GO_BiologicalProcess-Custom-GOA_21.11.2017_00h00	0.000499861	0.0224937	4.96132e-05	0.00014884	[4]	Group3	2.59259	7	[5-FCL, AT1G31910, AT2G24580, CAC3, FTRA2, MVD1, PDX1.2]
AT5G12020	10.752	HSP17.6	17.6 kDa class II heat shock protein [Source:UniProtKB/Swiss-Prot;Acc:P29830]								GO:0009266	response to temperature stimulus	GO_BiologicalProcess-Custom-GOA_21.11.2017_00h00	3.25626e-22	1.79094e-20	3.25626e-22	1.95375e-21	[3]	Group4	5.29101	30	[AT1G07400, AT1G53540, AT1G54050, AT1G59860, AT2G29500, AT5G37670, AT5G48570, AT5G51440, ATHSP22.0, BAG6, BOB1, CRL1, Fes1A, GRP7, HSA32, HSP101, HSP17.4, HSP17.6A, HSP17.6II, HSP18.2, HSP21, HSP23.6-MITO, HSP70, HSP70T-2, HSP90.1, Hop3, Hsp70b, MBF1C, MTHSC70-2, ROF1]
AT5G37670	9.0451	HSP15.7	15.7 kDa heat shock protein, peroxisomal [Source:UniProtKB/Swiss-Prot;Acc:Q9FHQ3]								GO:0009408	response to heat	GO_BiologicalProcess-Custom-GOA_21.11.2017_00h00	9.67684e-34	5.41903e-32	3.25626e-22	1.95375e-21	[3, 4]	Group4	14.0097	29	[AT1G07400, AT1G53540, AT1G54050, AT1G59860, AT2G29500, AT5G37670, AT5G48570, AT5G51440, ATHSP22.0, BAG6, BOB1, CRL1, Fes1A, HSA32, HSP101, HSP17.4, HSP17.6A, HSP17.6II, HSP18.2, HSP21, HSP23.6-MITO, HSP70, HSP70T-2, HSP90.1, Hop3, Hsp70b, MBF1C, MTHSC70-2, ROF1]
AT1G09870	7.6142	AT1G09870	At1g09870/F21M12_26 [Source:UniProtKB/TrEMBL;Acc:Q941B2]								GO:0006979	response to oxidative stress	GO_BiologicalProcess-Custom-GOA_21.11.2017_00h00	2.38463e-10	1.24001e-08	5.14734e-07	2.05894e-06	[3]	Group5	3.67171	17	[ALDH6B2, AT1G07400, AT1G54050, AT2G29500, AT3G10020, AT4G02580, AT5G37670, BAG6, GPX2, HSP101, HSP17.6A, HSP18.2, HSP21, HSP70, HSP70T-2, Hop3, MTK]
AT3G46230	7.086	HSP17.4A	17.4 kDa class I heat shock protein [Source:UniProtKB/Swiss-Prot;Acc:P19036]								GO:0010035	response to inorganic substance	GO_BiologicalProcess-Custom-GOA_21.11.2017_00h00	3.34801e-07	1.60704e-05	5.14734e-07	2.05894e-06	[3]	Group5	2.01271	19	[AT1G54050, AT2G17630, AT2G29500, BAG6, CRL1, DXR, HSP101, HSP17.6A, HSP18.2, HSP21, HSP23.6-MITO, HSP70, HSP70T-2, Hop3, MBF1C, MTHSC70-2, MTK, ROF1, emb2742]
AT5G55940	6.8354	EMB2731	ER membrane protein complex subunit 8/9 homolog [Source:UniProtKB/Swiss-Prot;Acc:Q9FG71]								GO:1901700	response to oxygen-containing compound	GO_BiologicalProcess-Custom-GOA_21.11.2017_00h00	0.0006262	0.0263004	5.14734e-07	2.05894e-06	[3]	Group5	1.21019	19	[AT1G54050, AT2G29500, AT5G37670, ATBETAFRUCT4, BAG6, CRL1, EFE, HSP101, HSP17.6A, HSP18.2, HSP21, HSP70, HSP70T-2, Hop3, LOX1, MAP1D, MBF1C, MTK, SOT16]
AT5G48790	6.5914	AT5G48790	AT5g48790/K24G6_12 [Source:UniProtKB/TrEMBL;Acc:Q94F50]								GO:0000302	response to reactive oxygen species	GO_BiologicalProcess-Custom-GOA_21.11.2017_00h00	2.53791e-10	1.29434e-08	5.14734e-07	2.05894e-06	[4]	Group5	6.38298	12	[AT1G54050, AT2G29500, AT5G37670, BAG6, HSP101, HSP17.6A, HSP18.2, HSP21, HSP70, HSP70T-2, Hop3, MTK]
AT3G18680	6.3975	AT3G18680	Amino acid kinase family protein [Source:UniProtKB/TrEMBL;Acc:A0A1I9LRT3]								GO:0010038	response to metal ion	GO_BiologicalProcess-Custom-GOA_21.11.2017_00h00	0.00103404	0.0413617	5.14734e-07	2.05894e-06	[4]	Group5	1.82186	9	[AT2G17630, CRL1, DXR, HSP23.6-MITO, HSP70, MTHSC70-2, MTK, ROF1, emb2742]
AT3G07090	6.3598	AT3G07090	PPPDE putative thiol peptidase family protein [Source:UniProtKB/TrEMBL;Acc:Q9SFT9]								GO:0042542	response to hydrogen peroxide	GO_BiologicalProcess-Custom-GOA_21.11.2017_00h00	1.96364e-12	1.06037e-10	5.14734e-07	2.05894e-06	[4, 5]	Group5	14.7059	10	[AT1G54050, AT2G29500, BAG6, HSP101, HSP17.6A, HSP18.2, HSP21, HSP70, HSP70T-2, Hop3]
AT4G27670	6.0412	HSP21	HSP21 [Source:UniProtKB/TrEMBL;Acc:A0A178UVU5]								GO:0009642	response to light intensity	GO_BiologicalProcess-Custom-GOA_21.11.2017_00h00	1.16708e-08	5.83542e-07	5.14734e-07	2.05894e-06	[5]	Group5	6.17284	10	[AT1G54050, AT2G29500, BAG6, HSP101, HSP17.6A, HSP18.2, HSP21, HSP70, HSP70T-2, Hop3]
AT5G12110	5.8943	AT5G12110	At5g12110 [Source:UniProtKB/TrEMBL;Acc:Q29PY2]								GO:0046686	response to cadmium ion	GO_BiologicalProcess-Custom-GOA_21.11.2017_00h00	0.00053321	0.0234612	5.14734e-07	2.05894e-06	[5]	Group5	2.23464	8	[AT2G17630, CRL1, DXR, HSP23.6-MITO, HSP70, MTHSC70-2, ROF1, emb2742]
AT2G29500	5.8914	HSP17.6B	17.6 kDa class I heat shock protein 2 [Source:UniProtKB/Swiss-Prot;Acc:Q9ZW31]								GO:0009644	response to high light intensity	GO_BiologicalProcess-Custom-GOA_21.11.2017_00h00	3.51631e-11	1.86364e-09	5.14734e-07	2.05894e-06	[6]	Group5	11.1111	10	[AT1G54050, AT2G29500, BAG6, HSP101, HSP17.6A, HSP18.2, HSP21, HSP70, HSP70T-2, Hop3]
AT1G08110	5.413	AT1G08110	Lactoylglutathione lyase [Source:UniProtKB/TrEMBL;Acc:B9DH52]
AT1G63610	5.1887	AT1G63610	At1g63610 [Source:UniProtKB/TrEMBL;Acc:Q9CAC8]
AT3G24500	5.1827	MBF1C	MBF1C [Source:UniProtKB/TrEMBL;Acc:A0A178VDH9]
AT1G05350	5.0096	AT1G05350	Ubiquitin-like modifier-activating enzyme 5 [Source:UniProtKB/Swiss-Prot;Acc:O23034]
AT5G43350	4.888	PHT1-1	Inorganic phosphate transporter 1-1 [Source:UniProtKB/Swiss-Prot;Acc:Q8VYM2]
AT2G20560	4.8261	AT2G20560	At2g20560/T13C7.15 [Source:UniProtKB/TrEMBL;Acc:Q9SIL3]
AT5G48570	4.7464	FKBP65	Peptidyl-prolyl cis-trans isomerase FKBP65 [Source:UniProtKB/Swiss-Prot;Acc:Q9FJL3]
AT5G59720	4.0168	HSP18.1	18.1 kDa class I heat shock protein [Source:UniProtKB/Swiss-Prot;Acc:P19037]
AT4G12400	3.6875	HOP3	Hsp70-Hsp90 organizing protein 3 [Source:UniProtKB/Swiss-Prot;Acc:Q9STH1]
AT1G59860	3.6843	HSP17.6A	17.6 kDa class I heat shock protein 1 [Source:UniProtKB/Swiss-Prot;Acc:Q9XIE3]
AT1G65020	3.642	AT1G65020	At1g65020 [Source:UniProtKB/TrEMBL;Acc:Q5XF12]
AT3G10020	3.4871	AT3G10020	AT3g10020/T22K18_16 [Source:UniProtKB/TrEMBL;Acc:Q9SR67]
AT5G52640	3.4412	HSP90-1	Heat shock protein 90-1 [Source:UniProtKB/Swiss-Prot;Acc:P27323]
AT1G16030	3.4061	HSP70-5	Hsp70b [Source:UniProtKB/TrEMBL;Acc:A0A178W9N7]
AT1G64740	3.3849	TUBA1	Tubulin alpha-1 chain [Source:UniProtKB/Swiss-Prot;Acc:P11139]
AT1G14150	3.0872	PNSL2	Photosynthetic NDH subunit of lumenal location 2, chloroplastic [Source:UniProtKB/Swiss-Prot;Acc:Q9XI73]
AT2G22475	2.8218	GEM	GLABRA2 expression modulator [Source:UniProtKB/Swiss-Prot;Acc:Q8S8F8]
AT4G21320	2.8117	HSA32	HSA32 [Source:UniProtKB/TrEMBL;Acc:A0A178UV51]
AT1G55020	2.8084	LOX1	Linoleate 9S-lipoxygenase 1 [Source:UniProtKB/Swiss-Prot;Acc:Q06327]
AT5G61970	2.7544	AT5G61970	Signal recognition particle subunit SRP68 [Source:UniProtKB/TrEMBL;Acc:Q9FH46]
AT1G74310	2.6732	CLPB1	Chaperone protein ClpB1 [Source:UniProtKB/Swiss-Prot;Acc:P42730]
AT2G24580	2.6476	AT2G24580	Probable sarcosine oxidase [Source:UniProtKB/Swiss-Prot;Acc:Q9SJA7]
AT5G08410	2.5626	FTRA2	ferredoxin/thioredoxin reductase subunit A (variable subunit) 2 [Source:TAIR;Acc:AT5G08410]
AT2G27600	2.5537	SKD1	Protein SUPPRESSOR OF K(+) TRANSPORT GROWTH DEFECT 1 [Source:UniProtKB/Swiss-Prot;Acc:Q9ZNT0]
AT1G07400	2.5164	HSP17.8	17.8 kDa class I heat shock protein [Source:UniProtKB/Swiss-Prot;Acc:Q9LNW0]
AT5G64050	2.4834	OVA3	Glutamate--tRNA ligase, chloroplastic/mitochondrial [Source:UniProtKB/Swiss-Prot;Acc:Q9FEA2]
AT3G44620	2.4212	AT3G44620	Protein-tyrosine phosphatase [Source:UniProtKB/TrEMBL;Acc:F4J355]
AT1G30070	2.3898	AT1G30070	SGS domain-containing protein [Source:UniProtKB/TrEMBL;Acc:F4I4Q9]
AT1G11660	2.3827	HSP70-16	Heat shock 70 kDa protein 16 [Source:UniProtKB/Swiss-Prot;Acc:Q9SAB1]
AT1G06900	2.3727	AT1G06900	Nardilysin-like [Source:UniProtKB/Swiss-Prot;Acc:F4HNU6]
AT1G66070	2.3551	AT1G66070	Eukaryotic translation initiation factor 3 subunit J [Source:UniProtKB/TrEMBL;Acc:A0A178WCY1]
AT4G24800	2.3106	AT4G24800	ECIP1 [Source:UniProtKB/TrEMBL;Acc:A0A384KU64]
AT5G51830	2.0992	AT5G51830	Probable fructokinase-7 [Source:UniProtKB/Swiss-Prot;Acc:Q9FLH8]
AT5G63990	2.0505	SAL3	Probable SAL3 phosphatase [Source:UniProtKB/Swiss-Prot;Acc:Q8GY63]
AT2G46240	2.0486	BAG6	BAG family molecular chaperone regulator 6 [Source:UniProtKB/Swiss-Prot;Acc:O82345]
AT5G53400	2.0311	BOB1	Protein BOBBER 1 [Source:UniProtKB/Swiss-Prot;Acc:Q9LV09]
AT4G20960	1.9987	PYRD	Riboflavin biosynthesis protein PYRD, chloroplastic [Source:UniProtKB/Swiss-Prot;Acc:Q8GWP5]
AT5G66420	1.9937	AT5G66420	AT5G66420 protein [Source:UniProtKB/TrEMBL;Acc:Q9FJZ7]
AT3G12580	1.983	MED37C	Probable mediator of RNA polymerase II transcription subunit 37c [Source:UniProtKB/Swiss-Prot;Acc:Q9LHA8]
AT5G49360	1.9752	BXL1	Beta-D-xylosidase 1 [Source:UniProtKB/Swiss-Prot;Acc:Q9FGY1]
AT2G32120	1.9083	HSP70-8	Heat shock 70 kDa protein 8 [Source:UniProtKB/Swiss-Prot;Acc:Q9SKY8]
AT2G31570	1.8681	GPX2	Probable glutathione peroxidase 2 [Source:UniProtKB/Swiss-Prot;Acc:O04922]
AT5G12030	1.8571	HSP17.7	17.7 kDa class II heat shock protein [Source:UniProtKB/Swiss-Prot;Acc:O81822]
AT2G14170	1.8428	ALDH6B2	Methylmalonate-semialdehyde dehydrogenase [acylating], mitochondrial [Source:UniProtKB/Swiss-Prot;Acc:Q0WM29]
AT4G25200	1.8409	HSP23.6	HSP23.6-MITO [Source:UniProtKB/TrEMBL;Acc:A0A178USN5]
AT4G31790	1.8262	AT4G31790	Probable diphthine methyl ester synthase [Source:UniProtKB/Swiss-Prot;Acc:O81769]
AT1G51100	1.8214	AT1G51100	CRR41 [Source:UniProtKB/TrEMBL;Acc:A0A178W725]
AT2G01440	1.8072	RECG	ATP-dependent DNA helicase homolog RECG, chloroplastic [Source:UniProtKB/Swiss-Prot;Acc:F4INA9]
AT5G54940	1.8048	AT5G54940	AT5g54940/MBG8_21 [Source:UniProtKB/TrEMBL;Acc:Q9FFT6]
AT1G51760	1.7627	ILL4	JR3 [Source:UniProtKB/TrEMBL;Acc:A0A178W8I8]
AT5G41210	1.7575	GSTT1	Glutathione S-transferase T1 [Source:UniProtKB/Swiss-Prot;Acc:Q9ZRT5]
AT1G72730	1.7509	TIF4A-3	Eukaryotic initiation factor 4A-3 [Source:UniProtKB/Swiss-Prot;Acc:Q9CAI7]
AT1G06690	1.744	AT1G06690	Uncharacterized oxidoreductase At1g06690, chloroplastic [Source:UniProtKB/Swiss-Prot;Acc:Q94A68]
AT4G10250	1.7345	HSP22.0	22.0 kDa heat shock protein [Source:UniProtKB/Swiss-Prot;Acc:Q38806]
AT2G20270	1.6988	AT2G20270	Thioredoxin superfamily protein [Source:UniProtKB/TrEMBL;Acc:F4IUG7]
AT3G02540	1.6748	RAD23C	Ubiquitin receptor RAD23c [Source:UniProtKB/Swiss-Prot;Acc:Q84L31]
AT1G63660	1.6736	AT1G63660	At1g63660 [Source:UniProtKB/TrEMBL;Acc:Q9CAD1]
AT4G21210	1.6622	RP1	Pyruvate, phosphate dikinase regulatory protein 1, chloroplastic [Source:UniProtKB/Swiss-Prot;Acc:O49562]
AT5G48180	1.6577	NSP5	Nitrile-specifier protein 5 [Source:UniProtKB/Swiss-Prot;Acc:Q93XW5]
AT3G09350	1.6552	Fes1A	Fes1A [Source:UniProtKB/TrEMBL;Acc:Q84J81]
AT1G12240	1.6425	BFRUCT4	Acid beta-fructofuranosidase 4, vacuolar [Source:UniProtKB/Swiss-Prot;Acc:Q39041]
AT3G16050	1.6374	PDX12	Pyridoxal 5'-phosphate synthase-like subunit PDX1.2 [Source:UniProtKB/Swiss-Prot;Acc:Q9ZNR6]
AT2G26230	1.6308	AT2G26230	Uricase [Source:UniProtKB/Swiss-Prot;Acc:O04420]
AT5G55610	1.61	AT5G55610	Isopentenyl-diphosphate delta-isomerase [Source:UniProtKB/TrEMBL;Acc:Q9FM77]
AT3G47930	1.6079	GLDH	GLDH [Source:UniProtKB/TrEMBL;Acc:A0A178VN92]
AT5G13050	1.598	5FCL	5-formyltetrahydrofolate cyclo-ligase, mitochondrial [Source:UniProtKB/Swiss-Prot;Acc:Q8L539]
AT5G66470	1.597	AT5G66470	GTPase ERA-like, chloroplastic [Source:UniProtKB/Swiss-Prot;Acc:Q8VZ74]
AT1G74100	1.571	SOT16	Sulfotransferase [Source:UniProtKB/TrEMBL;Acc:M1EU36]
ATCG00330	1.5554	RPS14	30S ribosomal protein S14, chloroplastic [Source:UniProtKB/TrEMBL;Acc:A0A1B1W4T5]
AT4G20980	1.5512	TIF3D1	Eukaryotic translation initiation factor 3 subunit D [Source:UniProtKB/Swiss-Prot;Acc:P56820]
AT1G10390	1.5332	NUP98A	Nuclear pore complex protein NUP98A [Source:UniProtKB/Swiss-Prot;Acc:Q8RY25]
AT5G09590	1.5213	HSP70-10	Heat shock 70 kDa protein 10, mitochondrial [Source:UniProtKB/Swiss-Prot;Acc:Q9LDZ0]
AT2G47650	1.5104	UXS4	AT2G47650 protein [Source:UniProtKB/TrEMBL;Acc:C0Z2I3]
AT3G25230	1.5084	ROF1	Peptidylprolyl isomerase [Source:UniProtKB/TrEMBL;Acc:B3H746]
AT5G28050	0.66627	AT5G28050	Cytidine/deoxycytidylate deaminase family protein [Source:TAIR;Acc:AT5G28050]
AT3G04780	0.66298	AT3G04780	PITH domain-containing protein At3g04780 [Source:UniProtKB/Swiss-Prot;Acc:Q9SQZ9]
AT5G64140	0.66037	RPS28C	RPS28 [Source:UniProtKB/TrEMBL;Acc:A0A178UA91]
AT4G37040	0.66017	MAP1D	Methionine aminopeptidase [Source:UniProtKB/TrEMBL;Acc:A0A178UWL4]
AT2G21660	0.65608	RBG7	Glycine-rich RNA-binding protein 7 [Source:UniProtKB/Swiss-Prot;Acc:Q03250]
AT5G27640	0.64967	TIF3B1	Eukaryotic translation initiation factor 3 subunit B [Source:UniProtKB/TrEMBL;Acc:F4K4D5]
AT4G02580	0.64743	AT4G02580	NADH dehydrogenase [ubiquinone] flavoprotein 2, mitochondrial [Source:UniProtKB/Swiss-Prot;Acc:O22769]
AT2G33590	0.64676	AT2G33590	CRL1 [Source:UniProtKB/TrEMBL;Acc:A0A178VRE7]
AT4G13200	0.64663	AT4G13200	Uncharacterized protein At4g13200, chloroplastic [Source:UniProtKB/Swiss-Prot;Acc:Q8LDV3]
AT1G23900	0.6451	GAMMA-ADR	AP-1 complex subunit gamma-1 [Source:UniProtKB/Swiss-Prot;Acc:Q84K16]
AT2G33040	0.64461	ATPC	ATP synthase subunit gamma, mitochondrial [Source:UniProtKB/Swiss-Prot;Acc:Q96250]
AT3G25150	0.62858	AT3G25150	Nuclear transport factor 2 (NTF2) family protein with RNA binding (RRM-RBD-RNP motifs) domain-containing protein [Source:UniProtKB/TrEMBL;Acc:F4J8X6]
AT2G18330	0.61202	AT2G18330	AAA-type ATPase family protein [Source:UniProtKB/TrEMBL;Acc:Q9ZPW5]
AT5G62790	0.60722	DXR	1-deoxy-D-xylulose 5-phosphate reductoisomerase [Source:UniProtKB/TrEMBL;Acc:F4K7T6]
AT1G21600	0.5957	PTAC6	AT1G21600 protein [Source:UniProtKB/TrEMBL;Acc:Q9XI19]
AT1G05010	0.58235	ACO4	1-aminocyclopropane-1-carboxylate oxidase 4 [Source:UniProtKB/Swiss-Prot;Acc:Q06588]
AT2G38040	0.56842	CAC3	Acetyl-coenzyme A carboxylase carboxyl transferase subunit alpha, chloroplastic [Source:UniProtKB/Swiss-Prot;Acc:Q9LD43]
AT3G08530	0.55796	CHC2	Clathrin heavy chain 2 [Source:UniProtKB/Swiss-Prot;Acc:Q0WLB5]
AT2G38700	0.55185	MVD1	Diphosphomevalonate decarboxylase [Source:UniProtKB/TrEMBL;Acc:A0A178VRG6]
AT2G17630	0.54748	PSAT2	Phosphoserine aminotransferase 2, chloroplastic [Source:UniProtKB/Swiss-Prot;Acc:Q9SHP0]
AT2G43810	0.5468	LSM6B	Sm-like protein LSM36B [Source:UniProtKB/Swiss-Prot;Acc:O22823]
AT5G38530	0.52979	TSBtype2	Tryptophan synthase beta chain [Source:UniProtKB/TrEMBL;Acc:Q9FFW8]
AT2G22125	0.48749	CSI1	Protein CELLULOSE SYNTHASE INTERACTIVE 1 [Source:UniProtKB/Swiss-Prot;Acc:F4IIM1]
AT3G16370	0.4682	APG	GDSL esterase/lipase APG [Source:UniProtKB/Swiss-Prot;Acc:Q9LU14]
AT2G24590	0.45044	RSZ22A	Serine/arginine-rich splicing factor RSZ22A [Source:UniProtKB/Swiss-Prot;Acc:Q9SJA6]
AT5G01750	0.39095	AT5G01750	Protein LURP-one-related 15 [Source:UniProtKB/Swiss-Prot;Acc:Q9LZX1]
ATCG00350	0.34519	PSAA	Photosystem I P700 chlorophyll a apoprotein A1 [Source:UniProtKB/Swiss-Prot;Acc:P56766]
AT3G07320	0.33898	AT3G07320	O-Glycosyl hydrolases family 17 protein [Source:UniProtKB/TrEMBL;Acc:Q9SRT4]
AT3G12670	0.31363	emb2742	Emb2742 [Source:UniProtKB/TrEMBL;Acc:A0A384K8P2]
AT5G59420	0.30826	ORP3C	Oxysterol-binding protein-related protein 3C [Source:UniProtKB/Swiss-Prot;Acc:Q93Y40]
ATCG00660	0.29335	RPL20	50S ribosomal protein L20, chloroplastic [Source:UniProtKB/Swiss-Prot;Acc:P56794]
AT1G59990	0.28777	RH22	DEAD-box ATP-dependent RNA helicase 22 [Source:UniProtKB/Swiss-Prot;Acc:Q944S1]
AT5G19180	0.25966	ECR1	NEDD8-activating enzyme E1 catalytic subunit [Source:UniProtKB/Swiss-Prot;Acc:O65041]
AT3G10220	0.25681	TFCB	Tubulin-folding cofactor B [Source:UniProtKB/Swiss-Prot;Acc:Q67Z52]
AT4G34120	0.24823	CBSX2	CBS domain-containing protein CBSX2, chloroplastic [Source:UniProtKB/Swiss-Prot;Acc:Q9C5D0]
AT1G14710	0.24223	AT1G14710	Hydroxyproline-rich glycoprotein family protein [Source:UniProtKB/TrEMBL;Acc:F4HWB0]
AT5G27560	0.2027	AT5G27560	DUF1995 domain protein, putative (DUF1995) [Source:UniProtKB/TrEMBL;Acc:Q94K68]
AT5G22510	0.18439	INVE	Alkaline/neutral invertase E, chloroplastic [Source:UniProtKB/Swiss-Prot;Acc:Q9FK88]
AT1G55150	0.13098	AT1G55150	DEA(D/H)-box RNA helicase family protein [Source:TAIR;Acc:AT1G55150]
AT1G29470	0.1213	AT1G29470	Probable methyltransferase PMT24 [Source:UniProtKB/Swiss-Prot;Acc:Q6NPR7]
AT3G17410	0.11597	AT3G17410	Protein kinase superfamily protein [Source:UniProtKB/TrEMBL;Acc:Q9LUT0]
AT3G27280	0.10927	PHB4	Prohibitin-4, mitochondrial [Source:UniProtKB/Swiss-Prot;Acc:Q9LK25]
AT3G58560	0.070706	CCR4-1	Carbon catabolite repressor protein 4 homolog 1 [Source:UniProtKB/Swiss-Prot;Acc:Q8W0Z9]
AT1G49820	0.069858	MTK	Methylthioribose kinase [Source:UniProtKB/Swiss-Prot;Acc:Q9C6D2]
AT2G03820	0.060377	AT2G03820	60S ribosomal export protein NMD3 [Source:UniProtKB/TrEMBL;Acc:Q9SI58]
AT5G06110	0.05605	AT5G06110	Cell division related protein-like [Source:UniProtKB/TrEMBL;Acc:Q9LHS5]

## Sheet: Supplementary Table S4
Supplementary Table S4: Proteins showing interaction in two-way ANOVA (genotype x treatment) [Control vs. acclimatized, genotypes arr3,4,5,6,8,9 vs WT]			Gene Ontology Enrichment analysis category Biological Processes
initial_alias	name	description	ID	Term	Ontology Source	Term PValue	Term PValue Corrected with Bonferroni step down	Group PValue	Group PValue Corrected with Bonferroni step down	GOLevels	GOGroups	% Associated Genes	Nr. Genes	Associated Genes Found
AT2G03820.1	AT2G03820	60S ribosomal export protein NMD3 [Source:UniProtKB/TrEMBL;Acc:Q9SI58]	GO:0010038	response to metal ion	GO_BiologicalProcess-Custom-GOA_21.11.2017_00h00	0	0	0	0	[4]	Group0	1.21	6	[ASP1, AT2G17630, MTK, PAC1, PLDALPHA1, emb2742]
AT4G33640.1	AT4G33640	unknown protein; Ha. [Source:TAIR;Acc:AT4G33640]	GO:0046686	response to cadmium ion	GO_BiologicalProcess-Custom-GOA_21.11.2017_00h00	0	0	0	0	[5]	Group0	1.4	5	[ASP1, AT2G17630, PAC1, PLDALPHA1, emb2742]
AT5G27560.3	AT5G27560	DUF1995 domain protein, putative (DUF1995) [Source:UniProtKB/TrEMBL;Acc:Q94K68]	GO:0006520	cellular amino acid metabolic process	GO_BiologicalProcess-Custom-GOA_21.11.2017_00h00	0	0.01	0	0	[3, 4, 6]	Group1	1.2	5	[AT2G17630, ERS, MTK, PGDH, TSBtype2]
AT1G59990.1	RH22	DEAD-box ATP-dependent RNA helicase 22 [Source:UniProtKB/Swiss-Prot;Acc:Q944S1]	GO:1901605	alpha-amino acid metabolic process	GO_BiologicalProcess-Custom-GOA_21.11.2017_00h00	0	0.01	0	0	[4, 5, 7]	Group1	1.37	4	[AT2G17630, MTK, PGDH, TSBtype2]
AT1G15710.1	TYRAAT2	Arogenate dehydrogenase 2, chloroplastic [Source:UniProtKB/Swiss-Prot;Acc:Q9LMR3]	GO:0008652	cellular amino acid biosynthetic process	GO_BiologicalProcess-Custom-GOA_21.11.2017_00h00	0	0	0	0	[4, 5, 6, 7]	Group1	1.92	4	[AT2G17630, MTK, PGDH, TSBtype2]
AT3G27280.1	PHB4	Prohibitin-4, mitochondrial [Source:UniProtKB/Swiss-Prot;Acc:Q9LK25]	GO:1901607	alpha-amino acid biosynthetic process	GO_BiologicalProcess-Custom-GOA_21.11.2017_00h00	0	0	0	0	[5, 6, 7, 8]	Group1	2.14	4	[AT2G17630, MTK, PGDH, TSBtype2]
AT4G40030.2	AT4G40030	Histone superfamily protein [Source:UniProtKB/TrEMBL;Acc:A8MRL0]	GO:0019637	organophosphate metabolic process	GO_BiologicalProcess-Custom-GOA_21.11.2017_00h00	0	0	0	0	[3, 4]	Group2	1.12	6	[AT3G18680, AT4G02580, MVD1, PLDALPHA1, PYRD, emb2742]
ATCG00710.1	PSBH	Photosystem II reaction center protein H [Source:UniProtKB/Swiss-Prot;Acc:P56780]	GO:0055086	nucleobase-containing small molecule metabolic process	GO_BiologicalProcess-Custom-GOA_21.11.2017_00h00	0	0	0	0	[3, 4, 5]	Group2	1.15	4	[AT3G18680, AT4G02580, PYRD, emb2742]
AT5G50960.1	NBP35	Cytosolic Fe-S cluster assembly factor NBP35 [Source:UniProtKB/TrEMBL;Acc:A0A178UBK9]	GO:0090407	organophosphate biosynthetic process	GO_BiologicalProcess-Custom-GOA_21.11.2017_00h00	0	0	0	0	[4, 5]	Group2	1.35	4	[AT3G18680, MVD1, PYRD, emb2742]
AT5G55940.1	EMB2731	ER membrane protein complex subunit 8/9 homolog [Source:UniProtKB/Swiss-Prot;Acc:Q9FG71]	GO:0006753	nucleoside phosphate metabolic process	GO_BiologicalProcess-Custom-GOA_21.11.2017_00h00	0	0.01	0	0	[4, 5, 6]	Group2	1.38	4	[AT3G18680, AT4G02580, PYRD, emb2742]
AT5G27640.2	TIF3B1	Eukaryotic translation initiation factor 3 subunit B [Source:UniProtKB/TrEMBL;Acc:F4K4D5]	GO:0009117	nucleotide metabolic process	GO_BiologicalProcess-Custom-GOA_21.11.2017_00h00	0	0.01	0	0	[5, 6, 7]	Group2	1.41	4	[AT3G18680, AT4G02580, PYRD, emb2742]
AT1G17745.2	PGDH	D-3-phosphoglycerate dehydrogenase [Source:TAIR;Acc:AT1G17745]
AT5G49650.1	XK-2	Xylulose kinase 2 [Source:UniProtKB/Swiss-Prot;Acc:Q949W8]
AT5G38530.1	TSBtype2	Tryptophan synthase beta chain [Source:UniProtKB/TrEMBL;Acc:Q9FFW8]
AT4G34120.1	CBSX2	CBS domain-containing protein CBSX2, chloroplastic [Source:UniProtKB/Swiss-Prot;Acc:Q9C5D0]
AT3G06510.2	SFR2	Glycosyl hydrolase superfamily protein [Source:TAIR;Acc:AT3G06510]
AT2G43810.1	LSM6B	Sm-like protein LSM36B [Source:UniProtKB/Swiss-Prot;Acc:O22823]
AT2G17630.1	PSAT2	Phosphoserine aminotransferase 2, chloroplastic [Source:UniProtKB/Swiss-Prot;Acc:Q9SHP0]
AT5G01750.2	AT5G01750	Protein LURP-one-related 15 [Source:UniProtKB/Swiss-Prot;Acc:Q9LZX1]
ATCG00330.1	RPS14	30S ribosomal protein S14, chloroplastic [Source:UniProtKB/TrEMBL;Acc:A0A1B1W4T5]
AT4G20960.1	PYRD	Riboflavin biosynthesis protein PYRD, chloroplastic [Source:UniProtKB/Swiss-Prot;Acc:Q8GWP5]
AT5G08060.1	AT5G08060	Furry [Source:UniProtKB/TrEMBL;Acc:Q9SD78]
AT1G66070.1	AT1G66070	Eukaryotic translation initiation factor 3 subunit J [Source:UniProtKB/TrEMBL;Acc:A0A178WCY1]
AT5G19180.1	ECR1	NEDD8-activating enzyme E1 catalytic subunit [Source:UniProtKB/Swiss-Prot;Acc:O65041]
AT1G31910.1	PMK	Phosphomevalonate kinase, peroxisomal [Source:UniProtKB/Swiss-Prot;Acc:Q9C6T1]
AT1G49820.1	MTK	Methylthioribose kinase [Source:UniProtKB/Swiss-Prot;Acc:Q9C6D2]
AT4G02580.1	AT4G02580	NADH dehydrogenase [ubiquinone] flavoprotein 2, mitochondrial [Source:UniProtKB/Swiss-Prot;Acc:O22769]
AT3G12670.1	emb2742	Emb2742 [Source:UniProtKB/TrEMBL;Acc:A0A384K8P2]
AT4G24800.3	AT4G24800	ECIP1 [Source:UniProtKB/TrEMBL;Acc:A0A384KU64]
AT1G05350.1	AT1G05350	Ubiquitin-like modifier-activating enzyme 5 [Source:UniProtKB/Swiss-Prot;Acc:O23034]
AT2G38700.1	MVD1	Diphosphomevalonate decarboxylase [Source:UniProtKB/TrEMBL;Acc:A0A178VRG6]
AT5G66470.2	AT5G66470	GTPase ERA-like, chloroplastic [Source:UniProtKB/Swiss-Prot;Acc:Q8VZ74]
AT3G59990.2	MAP2B	Methionine aminopeptidase 2B [Source:UniProtKB/Swiss-Prot;Acc:Q56Y85]
AT5G43060.1	RD21B	Probable cysteine protease RD21B [Source:UniProtKB/Swiss-Prot;Acc:Q9FMH8]
AT2G27600.1	SKD1	Protein SUPPRESSOR OF K(+) TRANSPORT GROWTH DEFECT 1 [Source:UniProtKB/Swiss-Prot;Acc:Q9ZNT0]
AT5G64050.1	OVA3	Glutamate--tRNA ligase, chloroplastic/mitochondrial [Source:UniProtKB/Swiss-Prot;Acc:Q9FEA2]
AT5G66420.2	AT5G66420	AT5G66420 protein [Source:UniProtKB/TrEMBL;Acc:Q9FJZ7]
AT5G20080.1	CBR2	NADH-cytochrome b5 reductase-like protein [Source:UniProtKB/Swiss-Prot;Acc:P83291]
ATCG00350.1	PSAA	Photosystem I P700 chlorophyll a apoprotein A1 [Source:UniProtKB/Swiss-Prot;Acc:P56766]
AT5G49360.1	BXL1	Beta-D-xylosidase 1 [Source:UniProtKB/Swiss-Prot;Acc:Q9FGY1]
AT4G10840.1	KLCR1	Protein KINESIN LIGHT CHAIN-RELATED 1 [Source:UniProtKB/Swiss-Prot;Acc:O81629]
AT2G30970.1	ASP1	Aspartate aminotransferase, mitochondrial [Source:UniProtKB/Swiss-Prot;Acc:P46643]
AT5G06110.1	AT5G06110	Cell division related protein-like [Source:UniProtKB/TrEMBL;Acc:Q9LHS5]
AT1G67790.1	SEOC	Protein SIEVE ELEMENT OCCLUSION C [Source:UniProtKB/Swiss-Prot;Acc:Q9FXE2]
AT5G26860.1	LON_ARA_ARA	lon protease 1 [Source:TAIR;Acc:AT5G26860]
AT1G65020.1	AT1G65020	At1g65020 [Source:UniProtKB/TrEMBL;Acc:Q5XF12]
AT3G18680.2	AT3G18680	Amino acid kinase family protein [Source:UniProtKB/TrEMBL;Acc:A0A1I9LRT3]
AT5G22510.2	INVE	Alkaline/neutral invertase E, chloroplastic [Source:UniProtKB/Swiss-Prot;Acc:Q9FK88]
AT5G43350.1	PHT1-1	Inorganic phosphate transporter 1-1 [Source:UniProtKB/Swiss-Prot;Acc:Q8VYM2]
AT1G08110.4	AT1G08110	Lactoylglutathione lyase [Source:UniProtKB/TrEMBL;Acc:B9DH52]
AT1G51100.1	AT1G51100	CRR41 [Source:UniProtKB/TrEMBL;Acc:A0A178W725]
AT5G54940.3	AT5G54940	AT5g54940/MBG8_21 [Source:UniProtKB/TrEMBL;Acc:Q9FFT6]
AT1G06190.5	AT1G06190	Rho termination factor [Source:TAIR;Acc:AT1G06190]
AT3G29360.1	UGD2	UDP-glucose 6-dehydrogenase 2 [Source:UniProtKB/Swiss-Prot;Acc:Q9LIA8]
AT3G52500.1	AT3G52500	At3g52500 [Source:UniProtKB/TrEMBL;Acc:Q9SVD1]
AT1G45201.3	ATTLL1	triacylglycerol lipase-like 1 [Source:TAIR;Acc:AT1G45201]
AT3G22110.1	PAC1	Proteasome subunit alpha type-4-A [Source:UniProtKB/Swiss-Prot;Acc:O81148]
AT5G67590.1	FRO1	NADH dehydrogenase [ubiquinone] iron-sulfur protein 4, mitochondrial [Source:UniProtKB/Swiss-Prot;Acc:Q9FJW4]
AT5G63570.1	GSA1	Glutamate-1-semialdehyde 2,1-aminomutase 1, chloroplastic [Source:UniProtKB/Swiss-Prot;Acc:P42799]
AT3G15730.1	PLDALPHA1	Phospholipase D alpha 1 [Source:UniProtKB/Swiss-Prot;Acc:Q38882]
AT4G20850.1	TPP2	Tripeptidyl-peptidase 2 [Source:UniProtKB/Swiss-Prot;Acc:F4JVN6]

## Sheet: Supplementary Table S5
Supplementary Table S5: Redox-related DAPs in arr5,6,8,9 and arr3,4,5,6,8,9 compared to WT
			Fold change (FC) compared to WT
Acession	Protein alias	Description	arr3,4,5,6,8,9	arr5,6,8,9
AT5G08410.2	FTRA2	ferredoxin/thioredoxin reductase subunit A	2.8846	3.2778
AT2G31570.1	GPX2	Probable glutathione peroxidase 2	1.8916	2.1145
AT5G41210.1	GSTT1	Glutathione S-transferase T1	1.9137	1.9667
AT4G26010.2	AT4G26010	Peroxidase superfamily protein	1.8122	1.898
AT1G51100.1	CRR41	CRR41;Chloroplast NADH dehydrogenase assembly protein	1.9016	1.9826
AT1G08110.4	AT1G08110	Lactoylglutathione lyase	5.5851	NC
AT3G49120.1	PER34	Peroxidase 34	2.0308	NC
AT2G20270.1	AT2G20270	Thioredoxin superfamily protein	1.5612	NC
AT4G02580.1	AT4G02580	NADH dehydrogenase	0.56213	NC
AT2G31570.1	GSTU1	Glutathione S-transferase U1	NC	2.0456
AT3G56350.1	MSD2	Superoxide dismutase	NC	1.6734
NC: not changed

## Sheet: Supplementary Table S6
Supplementary Table S6: List of primers used for qRT PCR
No.	Name	SEQUENCE (5'--->3')
1	PP2A_F	ATTCCGATAGTCGACCAAGC	Endogenous control
2	PP2A_R	AACATCAACATCTGGGTCTTCA
3	TAT1_F	CTCGGAATGGGAGACCCAAC
4	TAT1_R	GGGAAGACCGACGGTAGTAG
5	HPPD_F	TTGCCAGGGTTCGAGCGTGT
6	HPPD_R	TCGGCGGTTCCAACGTCGTC
7	VTE1_F	TCCGGACTCCTCACAGTGGGTAA
8	VTE1_R	AAAGTAGTCGTCGAATGGTGAGCC
9	VTE2_F	AATGCCACTGCGGGTCAGCC
10	VTE2_R	GCACCTGCAAATCCAATCACAGAGC
11	VTE3_F	CCGGTGACTCTCCTCTCCAGGTC
12	VTE3_R	TCCCAGGAGGAAGCGTCCCAA
13	VTE4_F	GAAACGTGGCTGTGGCGGCT
14	VTE4_R	AGGAAGCTAACCAGTAACACCGGCA
